# Supplementary material for: RHOA-FAK Is a Required Signaling Axis for the Maintenance of KRAS-Driven Lung Adenocarcinomas
Source: Oxford University Press journal article supplement (doi:10.1158/2159-8290.cd-12-0388), 2013-01-28
Supplement: 21598290cd120388-sup-supplementary_figure3_pdf_file_-_76k.pdf [file 21598290cd120388-sup-supplementary_figure3_pdf_file_-_76k.pdf]

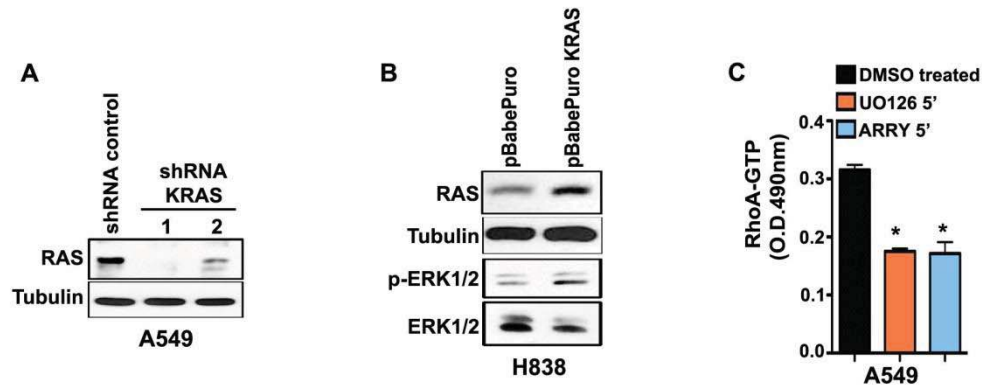

**Supplementary Figure S3. MEK/ERK inhibition suppresses RHOA.** (A) Immunoblot of A549 NSCLC cells transduced with 2 independent shRNAs against KRAS. (B) Immunoblot of H838 NSCLC cells (wild type *KRAS*, *INK4a/ARF* deficient) transduced either with an empty retrovirus or a retrovirus-expressing mutant KRAS. (C) G-LISA assay showing RHOA-GTP levels of A549 NSCLC cells as early as 5 minutes upon treatment with the indicated MEK1/2 inhibitors. ARRY: ARRY-142886; \* $P < 0.03$ .
